1     **Process evaluation of the development and remote recruitment for**  
2             **Essential Coaching for Every Mother during COVID-19**

3     **Justine Dol<sup>1\*</sup>, Gail Tomblin Murphy<sup>2</sup>, Douglas McMillan,<sup>3</sup> Megan Aston,<sup>4</sup> Marsha**  
4     **Campbell-Yeo<sup>4</sup>**

5     <sup>1</sup>Faculty of Health, Dalhousie University, Halifax, NS, Canada

6     <sup>2</sup> Nova Scotia Health Authority, Halifax, NS, Canada

7     <sup>3</sup> Department of Pediatrics, IWK Health Centre & Dalhousie University, Halifax, Canada

8     <sup>4</sup> School of Nursing, Dalhousie University, Halifax, Canada

9     \* **Correspondence:**

10    Justine Dol, Faculty of Health, Dalhousie University, Halifax, NS, Canada, [Justine.Dol@dal.ca](mailto:Justine.Dol@dal.ca)

11    **Keywords:** mHealth, postpartum, parenting, feasibility, postnatal education, program  
12    development

13

14

15

16 **Process evaluation of the development and remote recruitment for**  
17 **Essential Coaching for Every Mother during COVID-19**

18 **Abstract**

19 **Background:** With the sudden decrease in in-person support and increase in perinatal mental  
20 health concerns during the coronavirus pandemic, innovative strategies, such as mHealth, are  
21 more important than ever. This study has two objectives: (1) to describe the modification of  
22 *Essential Coaching for Every Mother* during the coronavirus pandemic, and (2) to describe the  
23 process evaluation of recruitment and retention of pregnant and postpartum women for a pre-post  
24 intervention study.

25  
26 **Methods:** For objective 1, modified messages were piloted with mothers and postpartum  
27 healthcare providers simultaneously. Semi-structured interviews were conducted with a subset of  
28 10 participants from the original development study. For objective 2, three methods were used  
29 for recruitment: social media, posters in hospital, and media outreach. First time mothers were  
30 eligible for enrollment antenatally (37+ weeks) and postnatally (<3 weeks). Eligibility screening  
31 occurred remotely via text message with participants initiating contact. Data were collected via  
32 TextIt and REDCap. Outcomes were days to recruit 75 participants, eligibility vs. ineligibility  
33 rates, dropout and exclusion reasons, survey completion rates, perinatal timing of enrollment,  
34 and recruitment sources.

35  
36 **Results:** For objective 1, three mothers (M age=30.67 years) and seven healthcare providers (M  
37 age = 46.0 years) participated in the modification of the messages. Participants felt the messages  
38 were appropriate and relevant related to changes in postpartum care during the coronavirus  
39 pandemic. Nine messages were modified related to coronavirus and five messages were added to  
40 the program. For objective 2, recruitment ran July 15<sup>th</sup>-September 19<sup>th</sup> (67 days) with 200  
41 screened and 88 enrolled, 70% antenatally. It took 50 days to enroll 75 participants. Mothers  
42 recruited antenatally (n=53) were more likely to receive all intervention message (68% vs. 19%).  
43 Mothers recruited postnatally (n=35) missed more messages on average (13.8 vs. 6.4).  
44 Participants heard about the study through family/friends (31%), news (20%), Facebook groups  
45 (16%), Facebook ads (14%), posters (12%), or other ways (7%).

46  
47 **Conclusion:** Antenatal recruitment resulted in participants enrolling earlier and receiving more  
48 of the study messages. Word of mouth and media outreach were successful, followed by  
49 advertisement on Facebook. Remote recruitment was a feasible way to recruit for *Essential*  
50 *Coaching for Every Mother*.

51  
52  
53  
54  
55

## 56 **1 Introduction**

57 Irrespective of a pandemic, mothers living in Nova Scotia and beyond face gaps in access to  
58 information and often struggle to find adequate support during the postpartum period, defined as  
59 the first six weeks after birth.<sup>1-3</sup> These gaps may be magnified during the coronavirus pandemic  
60 and may significantly impact the transition for new mothers.<sup>4</sup> Compliance with physical  
61 distancing recommendations contribute to mothers isolating at home, being physically isolated  
62 from not only health providers, but also from their extended family and support systems.<sup>4</sup> In  
63 Nova Scotia, all public health drop-ins were closed indefinitely, there was a reduction in in-  
64 person healthcare support, and midwifery-led home births and home visits were temporarily  
65 deferred during the coronavirus peak from March to May 2020.<sup>5</sup> This significantly differed from  
66 pre-coronavirus procedures, where mothers were recommended to have a postnatal contact  
67 shortly after birth by a public health nurse<sup>6</sup> and mothers frequently engaged in visits with family,  
68 friends, or new parent groups.<sup>7,8</sup> Emerging evidence shows that the pandemic has resulted in 37-  
69 54% of mothers experiencing perinatal depression and 57-72% experiencing symptoms of  
70 perinatal anxiety.<sup>9,10</sup> With the sudden decrease in in-person support and the increase in perinatal  
71 mental health concerns, innovative strategies, such as mHealth, are more important than ever as a  
72 means to offer information and support during the postpartum period.

73 Prior to the coronavirus outbreak, the *Essential Coaching for Every Mother* program was  
74 developed to send daily text messages to mothers during the immediate six-week postpartum  
75 period.<sup>11</sup> As a result of changes in care and postpartum recommendations after the coronavirus  
76 outbreak, changes were necessary in some of the messages. Additionally, given the requirement  
77 of physical distancing and limitations on the number of visitors in hospital, exploration was  
78 needed on the ability to recruitment remotely rather than the traditional, in-person approach for a  
79 planned randomized control trial. Therefore, this study has two aims: (1) to describe the  
80 modification of *Essential Coaching for Every Mother* to be applicable during the coronavirus  
81 pandemic, and (2) to describe the process evaluation of remote recruitment of pregnant and  
82 postpartum women for the *Essential Coaching for Every Mother* pre-post intervention study.  
83 This study focuses on describing the methodological processes, opportunities, and challenges for  
84 recruiting participation of women in a postpartum text message program during pandemic  
85 restrictions.

## 86 **2 Methods**

### 87 **2.1 Objective 1: Modification**

88 *Essential Coaching for Every Mother* is a six-week postpartum text message program that was  
89 previously developing in consultation with postpartum mothers and healthcare providers with the  
90 goal of improving women's psychosocial outcomes.<sup>11</sup> Details of the original development has  
91 been previously published.<sup>11</sup> With the outbreak of COVID-19 in early 2020 and the readiness of  
92 the *Essential Coaching for Every Mother* program to fill the sudden gap in postpartum support, a  
93 decision was made to modify the program to be offered immediately. Given that *Essential*  
94 *Coaching for Every Mother* was developed prior to the coronavirus outbreak but not previously  
95 implemented, some modifications were necessary of existing messages and for the inclusion of  
96 coronavirus related content. To ensure that the revised content of *Essential Coaching for Every*  
97 *Mother* was appropriate and acceptable, the modified messages were piloted with mothers and  
98 postpartum healthcare providers simultaneously. Messages were updated using the Government

99 of Canada and World Health Organization guidelines around mother-infant care and  
100 coronavirus<sup>12,13</sup> and followed the Government of Nova Scotia public health guidelines during the  
101 coronavirus pandemic.<sup>14</sup>

102 In the original *Essential Coaching for Every Mother* program, 53 messages were designed  
103 to be sent twice daily in the first two weeks, once a day for the following four weeks. In the  
104 modification, 10 existing messages were modified and 4 new messages were created. Of these,  
105 nine were significant enough to be piloted. Messages that were not piloted were due to simple  
106 modifications that did not warrant feedback (e.g., message was changed from ‘visit/go’ to ‘call’).

107

### 108 **2.1.1 Study population**

109 The study population were mothers and postpartum healthcare providers who care for the women  
110 and newborns during the postpartum period. Participants in the original development<sup>11</sup> were  
111 contacted as an update on the original research project and were asked to respond if they are  
112 interested in participating in this sub-study based on their prior knowledge of the program. The  
113 original study had 10 mothers and 18 healthcare providers enrolled, thus the targeted sample was  
114 for 10 participants (approximately a third of the original sample).

115

### 116 **2.1.2 Procedures**

117 Upon recruitment and prior to starting the interview, oral consent was obtained on the study  
118 purpose and for recording the interview. All interviews were conducted virtually, and the audio  
119 was recorded. Participants were shown the revised messages through screen sharing using video  
120 conference software by the first author who conducted all the interviews. The interviews were  
121 semi-structured, with the following questions starting the conversation for each category: How  
122 do you feel about these text messages to be sent to new moms during the first six-weeks? Was  
123 anything unclear or is there a different way you would say this? Each interview took  
124 approximately 20 minutes and occurred in the first week of June 2020. Ethics approval was  
125 obtained by the IWK Health Centre (#1024247).

126

### 127 **2.1.3 Analysis**

128 Interviews were transcribed verbatim to facilitate analysis. The first author completed manual  
129 analysis to make any further modifications to the messages based on the feedback obtained.

## 130 **2.2 Objective 2: Recruitment Evaluation**

131 The second objective of this study is to describe the process evaluation of remote recruitment of  
132 pregnant and postpartum women for the *Essential Coaching for Every Mother* pre-post  
133 intervention study. Specifically, the following outcomes were of interest: (1) number of days  
134 required to recruit at least 75 participants; (2) eligibility vs. ineligibility rates and reasons; (3)  
135 dropout, exclusion and baseline survey completion rates; (4) enrollment rates based on antenatal  
136 or postnatal recruitment; and (5) recruitment sources.

137

### 138 **2.2.1 Study Population & Sample Size**

139 Between 2017 and 2019 at the IWK Health Centre, 4,055 primiparous women gave birth,  
140 representing 45% of all mothers who delivered at this hospital;<sup>15</sup> this is about 169 primiparous  
141 births per month. Targeting recruitment over three months, a potential population of

142 approximately 500 mothers would be available. To determine feasibility of recruitment, the goal  
143 was to recruit at least 15% of this sample (n=75) within three months.

144 To participate, women must (1) have given birth to their first baby at the IWK Health  
145 Centre and live in Nova Scotia; (2) have daily access to a mobile phone with SMS capabilities;  
146 (3) be over 18 years of age; and (4) speak and read English. Only first-time mothers were  
147 included to minimize confounding factors such as prior knowledge and previous interactions  
148 with public health. Women were eligible to enrol antenatally if they were at least 37 weeks  
149 pregnant and had not yet given birth. The antenatal time limitation was set to ensure participants  
150 would deliver within the three-month recruitment period. Women were eligible to enrol  
151 postnatally up to 21 days following the birth of their child. The postpartum limit was set to  
152 ensure there was a least a three-week gap between baseline and 6-week follow-up surveys and to  
153 ensure participants received enough of the message to provide evaluative feedback.

### 154 155 **2.2.2 Recruitment Procedures**

156 Three primary methods of recruitment were used: social media, posters in the hospital, and  
157 media outreach. First, social media advertisements were used to recruit mothers via Facebook  
158 and Instagram advertisements and tweets on Twitter. Social media outreach and paid  
159 advertisements started on July 15<sup>th</sup>, 2020 and ran until August 16<sup>th</sup>, 2020. Second, postpartum  
160 mothers were targeted for recruitment via posters at the IWK Perinatal Clinic at IWK Health and  
161 in each room on the Family Newborn Unit. Posters were placed on August 5<sup>th</sup>, 2020 and taken  
162 down on September 15<sup>th</sup>. Finally, media interviews also occurred with the first author, with one  
163 televised news interview, two radio interviews, and several written media pieces occurring after  
164 a media release was published by IWK Health on August 5<sup>th</sup>, 2020. This targeted both prenatal  
165 and postpartum women.

166 All eligibility screening occurred remotely via text message through the TextIt platform<sup>16</sup>  
167 with interested participants initiating contact. Pregnant women started the recruitment process by  
168 texting ‘pregnant’ to the study number and proceeded through the antenatal eligibility screening  
169 process. Eligible mothers were instructed to text ‘delivered’ within 48 hours of giving birth to be  
170 enrolled in the study. During the antenatal screening process, participants were not truly enrolled  
171 in the study but were monitored for enrollment post-birth. During the antenatal recruitment flow,  
172 only the mother’s phone number and due date was collected via TextIt once she was deemed  
173 eligible. Women received reminder messages to text ‘delivered’ at 39 weeks, 40 weeks, 41  
174 weeks and 42 weeks if they had not yet enrolled or withdrawn. Mothers who were deemed  
175 ineligible as part of the antenatal screening due to being less than 37 weeks were sent a message  
176 to remind them to text ‘pregnant’ if they were still interested. This occurred until August 27<sup>th</sup>  
177 when the number of interest and enrolled participants was beyond the desired 75 participants.

178 Postpartum women who initiated contact using ‘birth’ proceeded through the postpartum  
179 eligibility flow. Once deemed eligible, postpartum participants and antenatal women who texted  
180 ‘delivered’ completed the same flow to be enrolled in the study and start receiving messages  
181 based on their delivery date. During this phase, additional details about newborn’s name,  
182 preferred gender pronoun, date of birth, mother’s name, and preference for breastfeeding or  
183 formula messages were collected through TextIt. This was used to personalize the messages with  
184 names and ensure messages were sent based on child’s age and preference for breastfeeding or  
185 formula messages.

186 Participants were asked to complete a consent form and survey at baseline (survey #1)  
187 and once the messages ended at 6-weeks (survey #2). Participants were reminded about the

## Development & Recruitment of ECEM in COVID-19

188 surveys via text message six times (every 2 days) at each timepoint or until they completed the  
189 full survey. On day 14 post-enrollment and/or program completion, participants who had yet to  
190 complete the full survey were sent an email or text as a final reminder and it was assumed to be  
191 incomplete if a participant did not complete after this point. All participants who completed the  
192 full survey received a \$20 electronic gift card at each survey timepoint. Figure 1 outlines of  
193 study enrollment and participation flow diagram.

194 While messages were only one-way, if a mother responded with a question of  
195 clarification during recruitment or related to the survey, the first author responded to provide  
196 clarification only. For example, if a mother asked if they would receive reminder messages, a  
197 brief message that reminder messages will be sent was provided as a response. No responses to  
198 the *Essential Coaching for Every Mother* messages occurred.  
199

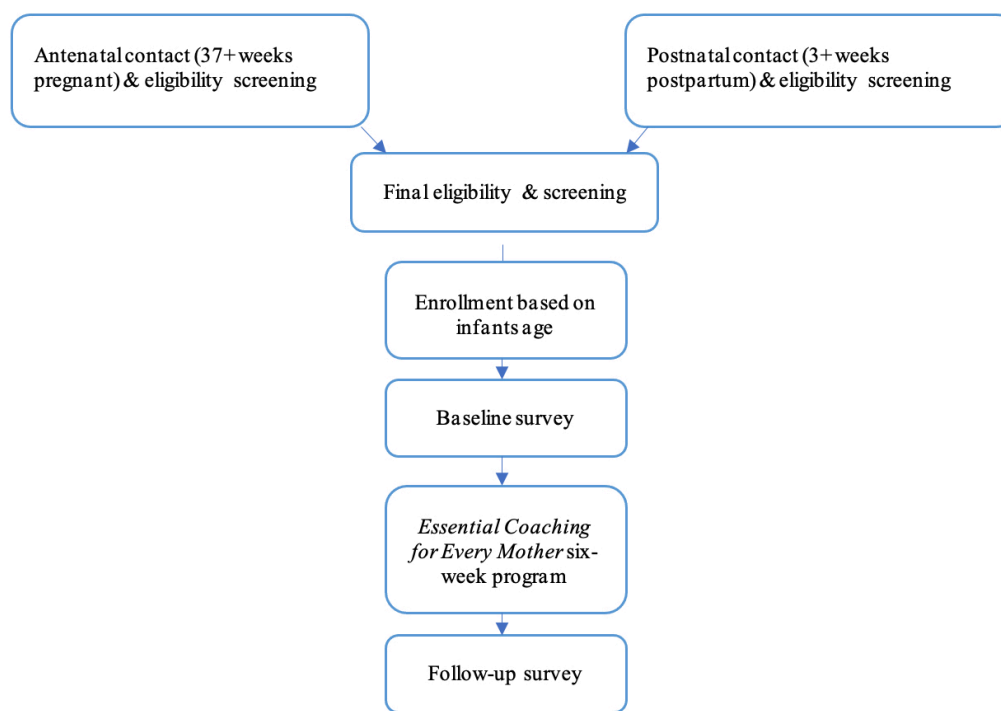

200

201 *Figure 1. Study enrollment and participation flow diagram*

202

### 203 2.2.3 Intervention Procedures

204 TextIt<sup>16</sup> was used as the platform to develop the message flows and capture participant  
205 contact information. It was used in conjunction with Twilio<sup>17</sup> the server that sent and received  
206 the messages. Survey data were collected via REDCap.<sup>18</sup> Contact information was collected via  
207 TextIt which was kept separate from survey data collected via REDCap. Survey data included  
208 questionnaires about psychosocial outcomes and evaluated the impact of the program. This data



209 will be reported elsewhere and is not the focus of this manuscript. Ethics approval was obtained  
210 by the IWK Health Centre (#1024984).

211 The first message of *Essential Coaching for Every Mother* is designed to start the evening  
212 of the second day after giving birth. This could be as early as 17 hours after birth (if a mom  
213 delivered at 11:59 the night before) or as late as 41 hours (if a mom delivered at midnight). If a  
214 participant signed up beyond this time frame, they started the messages based on when they  
215 delivered.

216 To determine feasibility, data on implementation extent was collected via output data  
217 available through the TextIt platform as well as REDCap. For the outcomes identified above, the  
218 following information was used:

- 219 • Days required to recruit participants = number of days from start of study to enrollment  
220 of 75 participants, total number of participants enrolled, and time required for recruitment
- 221 • Eligibility vs. ineligibility rates = number of individuals who were eligible and enrolled  
222 in the study vs. the number of individuals who contacted but were not eligible  
223 (comparing both antenatal and postpartum ineligibility and reasons)
- 224 • Dropout & survey completion rates = the number of participants who withdrew or were  
225 excluded from the study and when (% completion, timing of withdraw), number of  
226 surveys completed, partially and in full at baseline, time between initial survey request  
227 sent and completed
- 228 • Enrollment based on antenatal vs. postnatal recruitment = comparing number of antenatal  
229 vs. postpartum recruitment and timing of enrollment (number of messages received,  
230 infants age at enrollment, time of day of initial contact)
- 231 • Recruitment sources = enrolled participant's self-reported source of where they heard  
232 about the study

233

#### 234 **2.2.4 Analysis**

235 Descriptive analysis of TextIt and REDCap event data was used to examine the frequency and  
236 proportion of outcomes above. All descriptive analyses were completed in Excel.

### 237 **3 Results**

#### 238 **3.1 Objective 1 – Modification**

##### 239 **3.1.1 Participants**

240 Three mothers and seven healthcare providers participated in the modification of the messages.  
241 The mothers were a mean age of 30.67 years (Standard Deviation [SD] =1.53 years) and their  
242 infants were a mean age of 1 year, 17.71 weeks (SD = 2.42 weeks). All mothers were white and  
243 married.

244 The healthcare providers ranged in type of postpartum healthcare provider role, with one  
245 each of: postpartum unit registered nurse, public health nurse, family doctor, reproductive care  
246 program representative, midwife, family practice nurse, and a physiotherapist. Health care  
247 providers mean age was 46.0 years old (SD =9.87) and had a mean of 17.71 years (SD = 11.37)  
248 working with mothers. All postpartum healthcare providers were white women.

249

## Development & Recruitment of ECEM in COVID-19

### 250 3.1.2 Outcomes

251 Overall, the mothers and healthcare providers felt the messages were appropriate and relevant  
252 related to changes in postpartum care during the coronavirus pandemic. General feedback was  
253 related to ensuring that the messages shared information about what mothers could do (e.g., go  
254 for walks when safely physically distancing, going to their family doctors for vaccinations and  
255 follow-ups) and who to contact if they had questions (i.e., call 811 if you show COVID-19  
256 symptoms). There were also recommendations to provide links to current guidelines in case  
257 recommendations changed, which happened as Nova Scotia shifted from household isolation, to  
258 family bubbles, to the Atlantic province bubble.

259 Nine messages were modified from the original program to include information related to  
260 the coronavirus, of which four messages were collapsed into two, and five messages were added  
261 to the program. Three of the five messages were provided during the first two weeks of the  
262 program in which participants received on three days an additional message (three messages total  
263 per day) versus the usual two messages. The other two messages were sent in place of one of the  
264 previously collapsed message. In weeks three through six, usual messaging was reduced to one  
265 message a day. Figure 2 provides an example of two messages included – the first is a message  
266 that was revised to reflect the current standard of care in postnatal follow-up by a public health  
267 nurse which increased from within 48 hours to 3-5 days and may occur over the phone or online  
268 rather than in person. The second message is an example of a message that was added related  
269 specifically to postnatal care during COVID-19.

270

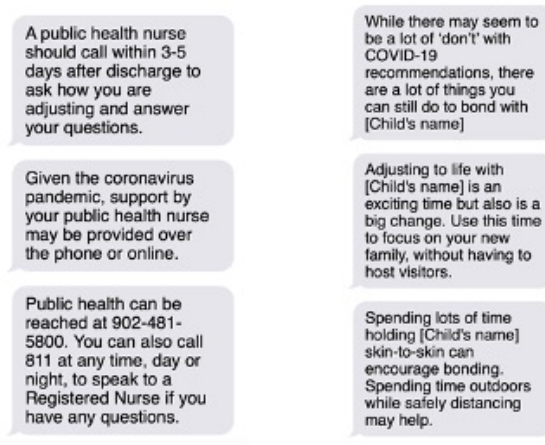

271

272

273 *Figure 2. Examples of Essential Coaching for Every Mother messages relevant to COVID-19*

274

### 275 3.2 Objective 2 - Recruitment & Completion

#### 276 Timing required to recruit participants

277 The study started recruitment on July 15, 2020 and stopped all enrollment on September 19,  
278 2020. This is a period of 67 days during which, 96 participants were enrolled in the program and  
279 were assigned a study identification number. Timing to enroll 75 participants (our initial target)  
280 took 50 days (July 15, 2020 to September 2, 2020).

281



282 **Eligibility vs. ineligibility**

283 A total of 200 initial contact messages were sent to the study contact number by potential  
284 participants during the recruitment period. Figure 3 outlines the perinatal timing and reasons for  
285 ineligibility. A total of 140 participants initiated contact antenatally and 60 participants had  
286 initiated contact in the postpartum period. For the antenatal participants, 30 were not eligible,  
287 seven were not interested, and 45 were excluded not being based in Nova Scotia. For the  
288 postpartum period, 20 were not eligible and two were not interested.

289 We had to exclude 45 participants who were not based in Nova Scotia and were using a  
290 United States (US) number. We initially thought this could be individuals who are temporarily  
291 residing in Canada since they provided valid Nova Scotia postal codes in the demographic  
292 questionnaire. However, upon further analysis, we believe these were not actual mothers from  
293 the US wanting to participate due to a discrepancy in the standardized questionnaire responses  
294 with extremely high scores on these measures (well beyond the standard mean) and quick  
295 completion time of their REDCap surveys (immediately after they enrolled and on their delivery  
296 date), suggesting these were not actual participants. When analyzing location through Twilio, the  
297 US had a predominant send/receive rate, providing further evidence that these respondents were  
298 not in Canada. Therefore, with the triangulation of these findings, it was deemed that these  
299 responses are not actual potential participants and if they were, they were not residing in Nova  
300 Scotia as required by the study protocol.

301

302 **Dropout & survey completion rates**

303 Of the 96 enrolled participants, four withdrew from the program after receiving 0, 5, 6 and  
304 9 messages respectively (Mean [M] = 4, Standard Deviation [SD] = 3.7). Three of the  
305 participants who withdrew enrolled in the postpartum period and one enrolled antenatally. As  
306 none of the participants who withdrew completed the baseline survey, we were unable to  
307 determine if these participants were different from those who completed the program. Four  
308 participants did not complete any aspect of the baseline survey, thus were excluded from the  
309 analysis.

310 Therefore, the study had a total of 88 participants who did not opt out and who completed  
311 at least some of the baseline survey. All participants received a reminder text messages to  
312 complete the survey every other day from enrollment until two weeks postpartum or survey  
313 completion, whichever came first, as well as a final email or text reminder to complete the  
314 survey. Ninety percent (90.1%) of participants completed the full survey, taking on average 5.0  
315 days to complete the baseline survey from enrollment (Median = 3 days, SD= 5.3 days, range 0-  
316 19 days). Nine percent (n=8) did not complete baseline survey in full – on average, participants  
317 completed 56.25% of the survey (range: 25%-75%).

318

319 **Timing of recruitment**

320 Of the 88 participants who were enrolled, 42 (47.7%) received full messages. Of these 42,  
321 36 were antenatally recruited and six were recruited postnatally. There were differences in the  
322 number of messages missed if participants were recruited antenatally or postnatally. Late  
323 enrollment during the antenatal period resulted in missing on average 6.4 messages (SD=6.2)  
324 whereas late enrollment during the postpartum period resulted in missing on average 13.8  
325 messages (SD=10.6). Similarly, when women enrolled antenatally, their infants were a mean of

## Development & Recruitment of ECEM in COVID-19

326 1.4 days old (SD=2.0) whereas when they enrolled postnatally, their infants were a mean of 6.0  
 327 days old (SD=5.3).

328 Most (40.4%) enrollment messages (text of ‘birth’ or ‘delivery’) were received in the  
 329 morning hours (between 0600-1200), followed by 24.7% in the afternoon (1200-1800), 20.7% in  
 330 the evening (1800-2400) and 14.6% overnight (0000-0600).

331

### 332 Recruitment sources

333 Among the 80 participants who completed the full survey, 30.5% (n=25) heard about the  
 334 study through friends or family and 18.3% (n=15) heard about it on the news. Recruitment via  
 335 Facebook was also successful, with a quarter of participants reached through the social media  
 336 platform – 14.6% via Facebook groups, 13.4% via Facebook advertisements, and 1.2% via  
 337 Facebook Marketplace. No participant reported hearing about it through Instagram or Twitter.  
 338 Posters in the hospital was the source of recruitment for 14.6% of participants, with 7.6% saying  
 339 other (including doula, social media broadly, hospital website, and no response).

340 For paid Facebook advertisements, a total of \$215.77 Canadian was spent, which equals  
 341 a cost of \$19.62 per enrolled participants who indicated this a primary recruitment method.  
 342 However, this may not be accurate as this does not consider whether any friends or family heard  
 343 about the study through paid advertisements.

344

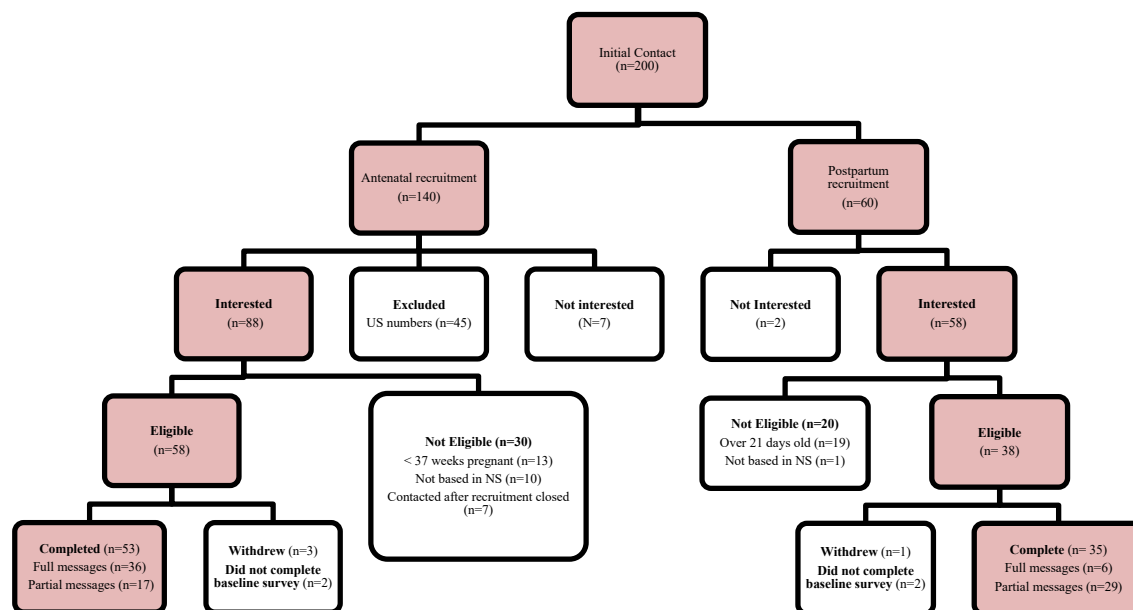

345  
 346  
 347 *Figure 3. Enrollment flow*  
 348

## 349 4 Discussion

## Development & Recruitment of ECEM in COVID-19

350 This study describes the modification of *Essential Coaching for Every Mother* to be  
351 applicable during the coronavirus pandemic as well as the process evaluation of remote  
352 recruitment for a pre-post intervention study. Overall, the modification of *Essential Coaching for*  
353 *Every Mother* to be applicable during the coronavirus pandemic was achieved relatively  
354 efficiently, with only nine messages modified out of the 53 originally developed with five  
355 messages added. We were able to maintain approximately twice a day messages for the first two  
356 weeks, followed by once a day for the following four weeks. Only three new messages were  
357 added to the program that did not fit into the original schedule and were sent in the first two  
358 weeks, resulting in participants receiving three messages per day for those days. In total,  
359 participants would receive up to 56 messages if they enrolled prior to 5pm on the second day of  
360 their infant's life.

361 In the modification feedback, participants encouraged the inclusion of links to current  
362 guidelines in case recommendations changed, which happened as Nova Scotia shifted from  
363 household isolation, to family bubbles, to the Atlantic province bubble. Given the rapidly  
364 changing nature of collective understanding of COVID-19 as well as the ebbs and flows of  
365 outbreaks, public health recommendations are constantly changing. One of the benefits of using  
366 mHealth is the ability to change and update content as needed.<sup>19</sup> *Essential Coaching for Every*  
367 *Mother* is not a static intervention, such as print media, which is harder to update and ensure  
368 everyone has the updated version, suggesting that mHealth could be a viable option to keep  
369 content up to date, especially during emerging health concerns.

370 Additionally, the online and remote recruitment of pregnant and postpartum women for a  
371 pre-post intervention study for *Essential Coaching for Every Mother* was a success as we were  
372 able to recruit over our target of 75 participants within 50 days, with recruitment suspended  
373 within 67 days due to significant interest. This suggests that mothers were interested in receiving  
374 information during the postpartum period, which may have been enhanced due to the pandemic.  
375 Emerging evidence shows that the pandemic has resulted in 37-54% of mothers experiencing  
376 perinatal depression and 57-72% experiencing symptoms of perinatal anxiety,<sup>9,10</sup> suggesting that  
377 a preventative mHealth program for mothers could have a positive effect on mothers postpartum  
378 adjustment and experience. Given the growing evidence of the mental health consequences of  
379 physical distancing recommendations,<sup>20</sup> particularly during an intensely vulnerable period as is  
380 the postpartum period, having evidence-based information provided via text message may help  
381 cover this gap. Digital health during COVID-19 has the potential to bridge the healthcare service  
382 gap while maintaining physical distancing recommendations.<sup>21,22</sup>

383 We found that mothers who were recruited antenatally received more of the study  
384 messages than participants who were recruited postnatally, with the latter missing on average 7.4  
385 messages more. As participants who initiated contact during the antenatal period were sent  
386 reminder messages starting at 39 weeks, they were more likely to enroll earlier than mothers who  
387 had already delivered. No mother who expressed interest during the antenatal period and was  
388 deemed eligible failed to enroll. Thus, antenatal recruitment may be a more efficient way to  
389 target recruitment for the larger clinical trial to ensure mothers receive as much of the program as  
390 possible. Additionally, given the delay in baseline survey completion after delivery, shifting to  
391 have participants complete the baseline survey upon enrollment and prior to delivery may result  
392 in more timely completion than during the postpartum period.

393 Looking at the direct recruitment methods, the most successful approach was promotion  
394 through Facebook. Both advertisement through mother-focused Facebook groups and paid  
395 advertisements were similarly effective. This finding is supported by previous systematic

396 reviews which found that Facebook recruitment was an effective way to reach participants for  
397 health research.<sup>23,24</sup> Within our study, we also found that sharing the study in the media and news  
398 reached 17% of participants and posters in the hospital reached 13.6% of participants, which  
399 suggests that using a multi-pronged approach to recruitment is more efficient than solely using  
400 social media.

#### 401 **4.1 Limitations**

402 Despite the successes, there were some challenges in recruitment. First, most participants  
403 heard about the study through family and friends, but it is unclear how these family and friends  
404 heard about it. Additionally, we were unable to gather how mothers who contacted us but did not  
405 enroll in the study heard about it. Both of these factors limit the interpretation of recruitment  
406 source analysis. A second challenge was the high potential for people to misuse the self-  
407 identification of eligibility screening which occurred exclusively via text message. This occurred  
408 in relation to the large number of non-Nova Scotia based on phones. We hypothesize that  
409 someone(s) had been completing the eligibility screening and baseline questionnaire to gain  
410 access to the honorarium. While TextIt cannot limit to provincial locations, we continued to  
411 monitor recruitment closely to ensure we identified any issues related to this through regularly  
412 monitoring of area codes. This may have potentially excluded individuals who were residing in  
413 Nova Scotia but had US numbers, this was required to ensure safety and adherence to study  
414 protocol inclusion criteria.

415 Another limitation was that limited sample size and diversity representation in the  
416 modification testing of *Essential Coaching for Every Mother*. However, as participants were  
417 recruited from the original development to ensure they were familiar with the program, having  
418 10 participants represents over a third of the original sample ( $10/28 = 35.7\%$ ). In terms of the  
419 sample being primarily white and women, this was recognized as a limitation of the original  
420 development and thus was not able to be controlled for this purpose. Further work should have a  
421 more direct focus on collecting a diverse sample.

#### 422 **4.2 Conclusion**

423 Despite these challenges, this study found that *Essential Coaching for Every Mother* was  
424 able to be successfully modified for implementation during the COVID-19 pandemic and remote  
425 recruitment of pregnant and postpartum women for a pre-post intervention study was possible  
426 using a variety of recruitment sources. Findings from this study will be applied in the  
427 development of a clinical trial to determine effectiveness in a real-world setting.

428

429 **5 Conflict of Interest**

430 The authors declare that the research was conducted in the absence of any commercial or financial  
431 relationships that could be construed as a potential conflict of interest.

432 **6 Author Contributions**

433 Author JD conceptualized the manuscript, conducted the data collection, wrote the manuscript, and  
434 edited all revisions. Authors MCY, GTM, MA and DM intellectually contributed to the development  
435 and writing of the manuscript, added text, and edited all revisions.

436 **7 Funding**

437 Funding for this project was from a Canadian Institute of Health Research Doctoral Award to Honour  
438 Nelson Mandela (FRN154341) and a BRIC NS Student Research Award which were awarded to JD.

439

440 **8 References**

- 441 1. Deave T, Johnson D, Ingram J. Transition to parenthood: The needs of parents in pregnancy  
442 and early parenthood. *BMC Pregnancy Childbirth*. 2008;8:1–11.
- 443 2. Martin A, Horowitz C, Balbierz A, Howell EA. Views of women and clinicians on postpartum  
444 preparation and recovery. *Matern Child Health J*. 2014;18(3):707–13.
- 445 3. Chalmers B, Dzakpasu S, Heaman M, Kaczorowski J. The Canadian Maternity Experiences  
446 Survey: An Overview of Findings. *J Obstet Gynaecol Canada*. 2008;30(3):217–28.
- 447 4. Dol J, Richardson B, Aston M, Mcmillan D, Tomblin murphy G, Campbell-yeo M. Impact of  
448 COVID-19 restrictions on the postpartum experience of women living in Eastern Canada: A  
449 mixed method cohort study. medRxiv [Internet]. 2021 Jan 1;2021.01.30.21250555. Available  
450 from: <http://medrxiv.org/content/early/2021/02/01/2021.01.30.21250555.abstract>
- 451 5. Nova Scotia Health Authority. Temporary service and facility closure notices from Nova  
452 Scotia Health Authority [Internet]. Webpage. 2020 [cited 2020 Apr 18]. Available from:  
453 [http://www.nshealth.ca/temporary-service-and-facility-closure-notices-nova-scotia-health-](http://www.nshealth.ca/temporary-service-and-facility-closure-notices-nova-scotia-health-authority-updated-310-pm-march-16)  
454 [authority-updated-310-pm-march-16](http://www.nshealth.ca/temporary-service-and-facility-closure-notices-nova-scotia-health-authority-updated-310-pm-march-16)
- 455 6. Reproductive Care Program of Nova Scotia. Healthy Babies, Healthy Families: Postpartum &  
456 Postnatal Guidelines. 2002;1–116. Available from:  
457 [http://novascotia.ca/dhw/publications/Public-Health-Education/Postpartum Guidelines.pdf](http://novascotia.ca/dhw/publications/Public-Health-Education/Postpartum%20Guidelines.pdf)
- 458 7. Aston M, Price S, Monaghan J, Sim M, Hunter A, Little V. Navigating and negotiating  
459 information and support: Experiences of first-time mothers. *J Clin Nurs*. 2018;27(3–4):640–9.
- 460 8. Johnson SA. ‘Intimate mothering publics’: comparing face-to-face support groups and Internet  
461 use for women seeking information and advice in the transition to first-time motherhood. *Cult*  
462 *Health Sex*. 2015;17(2):237–51.
- 463 9. Davenport M, Meyer S, Meah VL, Strynadka MC, Khurana R. Moms are not OK: COVID-19  
464 and maternal mental health. *Front Glob Women’s Heal*. 2020;1(June):1–6.
- 465 10. Lebel C, MacKinnon A, Bagshawe M, Tomfohr-Madsen L, Giesbrecht G. Elevated depression  
466 and anxiety among pregnant individuals during the COVID-19 pandemic. *J Affect Disord*.  
467 2020;277:5–13.
- 468 11. Dol J, Tomblin G, Aston M, Mcmillan D, Campbell-yeo M. Design, development and  
469 usability testing of Essential Coaching for Every Mother: A postnatal text message educational  
470 intervention. *Women and Birth*. 2020;(2019).
- 471 12. World Health Organization. Pregnancy, Childbirth, breastfeeding and COVID-19 [Internet].  
472 Webpage. 2020 [cited 2020 Aug 17]. Available from:  
473 [https://www.who.int/reproductivehealth/publications/emergencies/COVID-19-pregnancy-ipc-](https://www.who.int/reproductivehealth/publications/emergencies/COVID-19-pregnancy-ipc-breastfeeding-infographics/en/)  
474 [breastfeeding-infographics/en/](https://www.who.int/reproductivehealth/publications/emergencies/COVID-19-pregnancy-ipc-breastfeeding-infographics/en/)
- 475 13. Government of Canada. COVID-19: Pregnancy, childbirth and caring for newborns: Advice  
476 for mothers [Internet]. Webpage. 2020 [cited 2020 Aug 17]. Available from:



- 477 <https://www.canada.ca/en/public-health/services/publications/diseases-conditions/pregnancy-advise-mothers.html>  
478
- 479 14. Government of Nova Scotia. Novel coronavirus (COVID-19) [Internet]. Webpage. 2020 [cited  
480 2020 Aug 17]. Available from: <https://novascotia.ca/coronavirus/>
- 481 15. Reproductive Care Program of Nova Scotia. The Nova Scotia Atlee Perinatal Database.  
482 Halifax; 2020.
- 483 16. TextIt. TextIt [Internet]. Webpage. 2017 [cited 2018 May 3]. Available from: <http://textit.in>
- 484 17. Twilio. Twilio [Internet]. 2018 [cited 2018 Oct 24]. Available from: <https://www.twilio.com>
- 485 18. Harris PA, Taylor R, Thielke R, Payne J, Gonzalez N, Conde JG. Research electronic data  
486 capture (REDCap) – A metadata-driven methodology and workflow process for providing  
487 translational research informatics support. *J Biomed Inf.* 2009;42(2):377–81.
- 488 19. Patrick K, Hekler EB, Estrin D, Mohr DC, Riper H, Crane D, et al. The Pace of Technologic  
489 Change: Implications for Digital Health Behavior Intervention Research. *Am J Prev Med*  
490 [Internet]. 2016;51(5):816–24. Available from:  
491 <http://dx.doi.org/10.1016/j.amepre.2016.05.001>
- 492 20. Galea S, Merchant R, Lurie N. The Mental Health Consequences of COVID-19 and Physical  
493 Distancing: The Need for Prevention and Early Intervention. *JAMA Intern Med.*  
494 2020;180(6):817–8.
- 495 21. Torous J, Myrick KJ, Rauseo-Ricupero N, Firth J. Digital mental health and COVID-19:  
496 Using technology today to accelerate the curve on access and quality tomorrow. *J Med Internet*  
497 *Res.* 2020;22(3):1–6.
- 498 22. Fagherazzi G, Goetzinger C, Rashid MA, Aguayo GA, Huiart L. Digital health strategies to  
499 fight COVID-19 worldwide: Challenges, recommendations, and a call for papers. *J Med*  
500 *Internet Res.* 2020;22(6).
- 501 23. Whitaker C, Stevelink S, Fear N. The use of Facebook in recruiting participants for health  
502 research purposes: A systematic review. *J Med Internet Res.* 2017;19(8).
- 503 24. Thornton L, Batterham PJ, Fassnacht DB, Kay-Lambkin F, Calear AL, Hunt S. Recruiting for  
504 health, medical or psychosocial research using Facebook: Systematic review. *Internet Interv.*  
505 2016;4:72–81.

506
